# Supplementary material
Source: PubMed Central journal article supplement (PMC5312609)
Supplement: Supp_Figure1.pdf [file Supp_Figure1.pdf]

## Supplementary Data

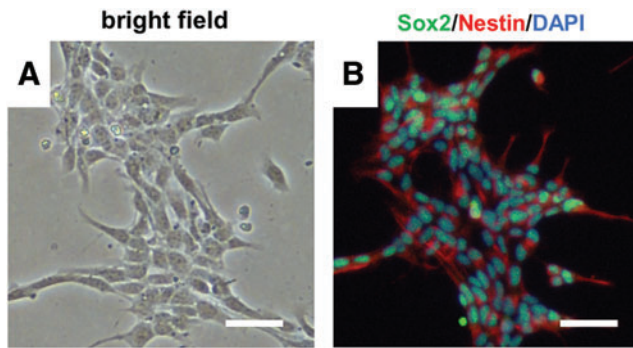

**SUPPLEMENTARY FIG. S1.** *Dgcr8*<sup>-/-</sup> NSCs can be stably propagated in vitro. (A) Bright field image and (B) immunostaining of Sox2 (green), Nestin (red), and DAPI (blue) of *Dgcr8*<sup>-/-</sup> NSCs at passage 20. Scale bars, 50 μm.
